# Supplementary material
Source: PubMed Central journal article supplement (PMC2658055)

**Supplemental Data Figure S1: Scatter plot of Night/Day pineal gene expression in experiment A vs. expression in experiment C.** This graph compares signal strengths for genes that have at least one probe set on both the RG\_U34A (Exp. A) and Rat230\_2 (Exp. C) microarrays; probe sets are not necessarily the same on both microarrays. Only probe sets with greater than 2-fold night/day change,  $FDR < 0.20$  and called "present" in 3 out of 4 replicates of either group are shown. Data points are taken from Supplemental Data Table S1.

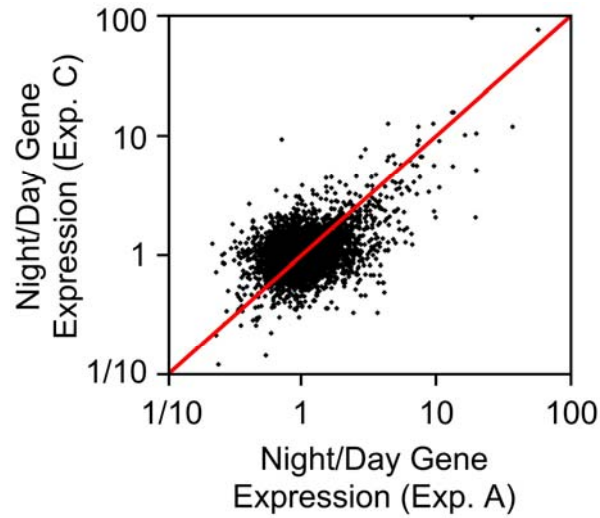

Supplement: M808394200_2.pdf [file M808394200_2.pdf]
