# Supplementary material
Source: PubMed Central journal article supplement (PMC2658055)
Supplement: M808394200_4.pdf [file M808394200_4.pdf]

**Supplemental Data Table S1.** Probes used for radiochemical *in situ* hybridization confirmation of night/day differences and tissue selective expression of genes in the pineal gland. \*, predicted gene.

| Gene Symbol   | GenBank Accession number | Probe description |      |                                         |
|---------------|--------------------------|-------------------|------|-----------------------------------------|
|               |                          | 3'                | 5'   | Sequence                                |
| <i>Aanat</i>  | NM_012818                | 372               | 409  | GTCCCAAAGTGAACCGATGATGAAGGCCACAAGACACC  |
| <i>Acly</i>   | NM_016987                | 948               | 985  | CGTAATTCGCCAGTTCGTTGACACCTCCAAGAATCACAG |
| <i>Alox15</i> | NM_031010                | 919               | 956  | ATGGCTATGGGCAAGAGTTGTCCATCAGGCATCAGCTT  |
| <i>Asmt</i>   | NM_144759                | 423               | 460  | GAATGTGGATGACAGCGCAGAGTTGGTGTAGAAGCCGT  |
| <i>Atp7b</i>  | AF120492                 | 38                | 75   | CTCACTACAGGCTCCACAGCAGAGTGCGAAACATCACC  |
| <i>Crem</i>   | NM_017334                | 110               | 147  | CTGGTAAGTTGGCATGTCACCTGTGGCAGCAGCCATGT  |
| <i>Crx</i>    | NM_021855                | 191               | 228  | GATCTTGAGAGCAACCTCCTCACGTGCATACACATCCG  |
| <i>Dusp1</i>  | NM_053769                | 19                | 56   | AATCCTCAAGTGCTCGCTGATCCTAATCTGGCTTCACC  |
| <i>Esm1</i>   | NM_022604                | 145               | 182  | GTGCAGAGGAATCAGGAGCGTGGTCAGTAGCAAGAGGC  |
| <i>Fosl2</i>  | NM_012954                | 379               | 408  | CTTGTTTCTCTCTCGCCGGATTCGACGCTT          |
| <i>Gch1</i>   | NM_024356                | 197               | 234  | TTGGCCTCGGGCGGCCGGGACTTCTCGGCAGGTCGGCT  |
| <i>Gnb3</i>   | NM_021858                | 1123              | 1160 | TCCCACCTTCTCCTCCAGCCTCCTCAGTTCCAGATCTT  |
| <i>Mt1a</i>   | M11794                   | 7198              | 7235 | TCCGAGATCTGGTGAATCTGGAGCAACGGTGTAAAGCGA |
| <i>Nptx1</i>  | NM_153735.2              | 912               | 949  | TGGACTTGAGCCACATGCACACAGTGAAGGCGTACATC  |
| <i>Pdc</i>    | NM_012872                | 481               | 518  | CTGACACCATCCTCGTAAATGTTAACCACGATGGTGGT  |
| <i>Per2</i>   | NM_031678                | 283               | 320  | GTGAGTGTTGGACGATTCCACTAACATCCGCAGCTCCT  |
| <i>Rorb*</i>  | XM_219749                | 1021              | 1058 | AGGTTGCTGAGGCCATTGCTAATGCTGCTGCTGTACAC  |
| <i>Tph1</i>   | NM_001100634             | 755               | 792  | CTCTCGGTGAGAGGTAACCAGCCACAGGACGGATGGAA  |
| <i>Ttr</i>    | NM_012681                | 474               | 511  | TCAGTACAAATGGGAGCTACTGCTTTGGCAAGATCTTG  |
