# Supplementary material
Source: PubMed Central journal article supplement (PMC2658055)
Supplement: M808394200_5.pdf [file M808394200_5.pdf]

**Supplemental Data Table S2. Primers used for qRT-PCR.** Primer pairs were designed using the program ProbeFinder. Where accession numbers are not available, Entrez Gene identifiers are given. \*, predicted gene; #, genes used for normalization.

| Gene Symbol    | GenBank Accession number | Sense primer                    | Antisense primer                | Product size (bp) |
|----------------|--------------------------|---------------------------------|---------------------------------|-------------------|
| <i>Aanat</i>   | NM_012818                | 5'-TCCTGTGGAGATACCTCCACCA-3'    | 5'-CAGCTCAGTGAAGGTGAGAGAT-3'    | 155               |
| <i>Abca1</i>   | NM_178095                | 5'-TGAAAAACCAGGCGATGG-3'        | 5'-CAAGAGAGTGGAGAGACGAAGC-3'    | 70                |
| <i>Acly</i>    | NM_016987                | 5'-CTTTGGGCGTGAGGCATA-3'        | 5'-CCACTTTTGGCATCCAGGT-3'       | 60                |
| <i>Actb#</i>   | NM_031144                | 5'-ACGGTCAGGTCATCACTATCG-3'     | 5'-AGCCACCAATCCACACAGA-3'       | 300               |
| <i>Alox15</i>  | NM_031010                | 5'-TGCCTGATGGACAACCTTTG-3'      | 5'-TAGACCCAGTTTTGGGCAGT-3'      | 60                |
| <i>Asmt</i>    | NM_144759                | 5'-GCTTCCGGTCATCTGTG-3'         | 5'-ACGGAGCTACCGGGATAGAG-3'      | 82                |
| <i>Ccl9</i>    | NM_001012357             | 5'-GGCCCAGATCGTACATGC-3'        | 5'-CCCAGGCTAAAAAGCTGATG-3'      | 75                |
| <i>Cd8a</i>    | NM_031538                | 5'-TGCCGGTGTTCAGAAAGT-3'        | 5'-GTCGCAAGCTTCTGGTC-3'         | 114               |
| <i>Cebpb</i>   | NM_024125                | 5'-AAGCTGAGCGACGAGTACAA-3'      | 5'-CAGCTGCTCCACCTTCTTCT-3'      | 155               |
| <i>Cited4</i>  | NM_053699                | 5'-TACGGCTCTTTCGGATCG-3'        | 5'-AGACTGAAGGTGCGCGTTAC-3'      | 84                |
| <i>Crem</i>    | NM_017334                | 5'-CTGGAGATGAACTGATGAGGAG-3'    | 5'-AGCTCGGATCTGGTAAGTTGG-3'     | 89                |
| <i>Ddc</i>     | NM_012545                | 5'-GCTGCATTGGCTTCTCT-3'         | 5'-GCCAATCCATCATCACTGTCT-3'     | 69                |
| <i>Dio2</i>    | NM_031720                | 5'-TGAATTGATGGTCCACTCC-3'       | 5'-GGTGAGGGAGAGGGAGAAAA-3'      | 127               |
| <i>Drd4</i>    | NM_012944                | 5'-TGGTGTTCCTCTCTTTGTCT-3'      | 5'-GCCATGAGGGTGTCCACAGA-3'      | 76                |
| <i>Dusp1</i>   | NM_053769                | 5'-CTCGCCAATTGTCTTAACCAC-3'     | 5'-AGGTAAGCAAGGCAGATGGTGG-3'    | 200               |
| <i>Egr1</i>    | NM_012551                | 5'-TACGAGCACCTGACCACAGA-3'      | 5'-GGGTAGTTTGGCTGGGATAAC-3'     | 91                |
| <i>Esm1</i>    | NM_022604                | 5'-ACCTCTGCCTCCAAACAG-3'        | 5'-CCGGTCTCCAATCTTCTCT-3'       | 75                |
| <i>Fcer1a</i>  | NM_012724                | 5'-TGTGTAAGTGAACGTGATGCAA-3'    | 5'-TGTCTAAGACCAGTCAGCAG-3'      | 65                |
| <i>Fosl2</i>   | NM_012954                | 5'-AGAGGAGGAGAAGCGTGAATC-3'     | 5'-CTCCTTCTGCAGCTCAGCGATT-3'    | 162               |
| <i>Galnt14</i> | NM_001012109             | 5'-TGGATGGATGAATACAAGCAAT-3'    | 5'-TCAGGTTTCCAGCTGTTCTCA-3'     | 91                |
| <i>Gapdh#</i>  | NM_017008                | 5'-TGGTGAAGGTCCGGTGTGAACGGAT-3' | 5'-TCCATGGTGGTGAAGACGCCAGTA-3'  | 310               |
| <i>Gch1</i>    | NM_024356                | 5'-CAGTGGCCATCACAGAAGC-3'       | 5'-ACCTCGCATGACCATACACA-3'      | 83                |
| <i>Hhip*</i>   | XM_238042                | 5'-GTGTTCCGGAGATGCCAATG-3'      | 5'-TTTTCTTGCCATTGCTTAGTCA-3'    | 71                |
| <i>Hprt1#</i>  | NM_012583                | 5'-TGACTGCGCAAAACAATGCA-3'      | 5'-GGTCTTTTTACCAGCAAGCT-3'      | 94                |
| <i>Id1</i>     | NM_012797                | 5'-GCGAGATCAGTGCCTTGG-3'        | 5'-TTTTCTCTTGCCTCCTGAA-3'       | 123               |
| <i>Id3</i>     | NM_013058                | 5'-AGGAGTTTTTGCCACTGACC-3'      | 5'-CTCATCCATGCCCTCAG-3'         | 127               |
| <i>Il18</i>    | NM_019165                | 5'-CCTGATATCGACCGAACAGC-3'      | 5'-CCTTCCATCCTTACAGATAGG-3'     | 111               |
| <i>Kpna2</i>   | NM_053483                | 5'-AGGAAAACCAGAAACACAG-3'       | 5'-AGTTCCGAGCAGCTTGAGT-3'       | 115               |
| <i>Lta</i>     | NM_080769                | 5'-CCCCCTCAGAAGCACTTG-3'        | 5'-TGAATTCTGTTTGTGGGTA-3'       | 78                |
| <i>Map3k5</i>  | 293015                   | 5'-GGACCAAGAAATTAAGCACCTG-3'    | 5'-GGGAAACCCAGGGTATCTAT-3'      | 61                |
| <i>Mat2a</i>   | NM_134351                | 5'-ATGCTGTCTTGATGCACAC-3'       | 5'-TTCCAGTTTTAGCAACAGTTTCCAC-3' | 75                |
| <i>Mfrp</i>    | NM_001108137             | 5'-CAGCACTACCTCACCAACA-3'       | 5'-CCTCCACGTAGTCAAACCTGC-3'     | 127               |
| <i>Neurod1</i> | NM_019218                | 5'-AACACGAACCATCCACCGAG-3'      | 5'-GCTCATGATGCGAATGGCTA-3'      | 177               |
| <i>Nptx1</i>   | NM_153735                | 5'-TATCAAACACAGGGTGTGC-3'       | 5'-TCAAACCCTCCGCTAGAG-3'        | 63                |
| <i>Npy1r</i>   | NM_001013032             | 5'-CTGCAACCAATCTGCTGT-3'        | 5'-TGACGCAGGTGGAGATCAT-3'       | 62                |
| <i>Nr4a2</i>   | NM_019328                | 5'-CCACGTCGACTCCAATCC-3'        | 5'-ATAGTCAGGGTTTGCCTGGA-3'      | 67                |
| <i>Opn1sw</i>  | 81644                    | 5'-CCCCATCATCTACTGCTTCAT-3'     | 5'-AGCCAGACATGTCAGATTCGT-3'     | 98                |
| <i>Pde10a</i>  | NM_022236                | 5'-CCCTGCTATACCACCCTGACG-3'     | 5'-GGTCGGCTTCTCAGATGTGCT-3'     | 162               |
| <i>Per2</i>    | NM_031678                | 5'-AGCTTCTGGTCTGGACTGCAC-3'     | 5'-GAGGTGGAGATGGCCTACTG-3'      | 110               |
| <i>Rnr1#</i>   | 24721                    | 5'-TTGAAAATCCGGGGAGAG-3'        | 5'-ACATTGTTCCAACATGCCAG-3'      | 99                |
| <i>Slc15a1</i> | NM_057121                | 5'-TGATGGCTGCCTGGAAGTGAAG-3'    | 5'-ACGGTTAGAAGCCATCCTGCCT-3'    | 191               |
| <i>Slc6a17</i> | NM_001033079             | 5'-GTGCCCAAGGAGATGTTAC-3'       | 5'-CAATAGCCCCACGAAGAATG-3'      | 60                |
| <i>Snf1k</i>   | NM_021693                | 5'-CGTCGGATACGTCTCTCACTC-3'     | 5'-GCGTTTTTCTTACTGCTG-3'        | 61                |
| <i>St8sia5</i> | NM_213628                | 5'-CAGGAGATCCTGGAGGTGAA-3'      | 5'-TTGCATATCTGGAGGCTCTTC-3'     | 83                |
| <i>Tnf</i>     | NM_012675                | 5'-CGTAGCCACGTCGTAGC            | 5'-GGTTGCTTTGAGATCCATGC-3'      | 104               |
| <i>Tph1</i>    | NM_001100634             | 5'-CAAGGAGAACAAGACCATT-3'       | 5'-ATTCAGCTGTTCTCGTTGATG-3'     | 208               |
| <i>Ttr</i>     | NM_012681                | 5'-CATTCCATGAATACGCAGAGG-3'     | 5'-TGTAGTGGCGATGACCAGAG-3'      | 60                |
| <i>Ush2a</i>   | 266765                   | 5'-GACTTGGAATGGACAGTATCAG-3'    | 5'-GCCAGTCTCCAGAGAGA-3'         | 118               |
