# Supplementary material
Source: PubMed Central journal article supplement (PMC2658055)
Supplement: M808394200_6.pdf [file M808394200_6.pdf]

**Supplemental Data Table S6. Effects of norepinephrine (NE), dibutyryl cyclic AMP (DBcAMP) or Forskolin on transcript abundance in cultured pineal glands.** This is an expanded version of Table 6. Glands were cultured for 48 hours prior to the initiation of the indicated treatment. Treatment duration was 6 hours. Transcript abundance was measured by qRT-PCR and normalized as described in the Experimental Procedures. Each value is based on results obtained from 3 pools of 3 glands and given as the mean  $\pm$  SE and as a treatment/control ratio. \*  $p < 0.01$ ; # , genes used for normalization.

| Gene Symbol    | Control (Copies)     | NE (Copies)          | NE Control | DBcAMP (Copies)         | DBcAMP Control | Forskolin (copies)    | Forskolin Control |
|----------------|----------------------|----------------------|------------|-------------------------|----------------|-----------------------|-------------------|
| <i>Aanat</i>   | 3,760 $\pm$ 338      | 540,380 $\pm$ 32,900 | 143.7*     | 1,070,908 $\pm$ 250,734 | 284.8*         | 361,885 $\pm$ 76,316  | 96.2*             |
| <i>Abca1</i>   | 2,834 $\pm$ 172      | 6,883 $\pm$ 199      | 2.43*      | 11,934 $\pm$ 2,241      | 4.21*          | 6,395 $\pm$ 854       | 2.26*             |
| <i>Acly</i>    | 15,093 $\pm$ 1,234   | 11,899 $\pm$ 1,265   | 1/1.27     | 20,157 $\pm$ 2,014      | 1.34           | 22,977 $\pm$ 2,300    | 1.52              |
| <i>Actb#</i>   | 597,921 $\pm$ 33,046 | 496,550 $\pm$ 59,503 | 1/1.20     | 509,526 $\pm$ 50,888    | 1/1.17         | 490,627 $\pm$ 88,506  | 1/1.22            |
| <i>Alox15</i>  | 369,814 $\pm$ 26,530 | 420,870 $\pm$ 12,228 | 1.14       | 598,940 $\pm$ 73,964    | 1.62           | 589,771 $\pm$ 140,084 | 1.59              |
| <i>Asmt</i>    | 14,633 $\pm$ 1,302   | 16,266 $\pm$ 709     | 1.11       | 19,141 $\pm$ 282        | 1.31           | 26,395 $\pm$ 7,943    | 1.80              |
| <i>Ccl9</i>    | 451 $\pm$ 130        | 138 $\pm$ 14         | 1/3.27     | 129 $\pm$ 33            | 1/3.50         | 43 $\pm$ 28           | 1/10.49           |
| <i>Cd8a</i>    | 13 $\pm$ 3           | 10 $\pm$ 1           | 1/1.30     | 31 $\pm$ 26             | 2.45           | 48 $\pm$ 30           | 3.78              |
| <i>Cebpb</i>   | 8,432 $\pm$ 1,435    | 17,714 $\pm$ 181     | 2.10       | 40,272 $\pm$ 3,603      | 4.78*          | 20,220 $\pm$ 3,032    | 2.40              |
| <i>Cited4</i>  | 119 $\pm$ 2          | 5,958 $\pm$ 291      | 50.1*      | 9,992 $\pm$ 1,157       | 84.1*          | 5,840 $\pm$ 1,553     | 49.1*             |
| <i>Crem</i>    | 1,091 $\pm$ 30       | 34,497 $\pm$ 4,657   | 31.6*      | 35,513 $\pm$ 4,900      | 32.5*          | 30,160 $\pm$ 7,109    | 27.6*             |
| <i>Ddc</i>     | 12,516 $\pm$ 1,649   | 9,703 $\pm$ 545      | 1/1.29     | 12,597 $\pm$ 971        | 1.01           | 11,675 $\pm$ 2,648    | 1/1.07            |
| <i>Dio2</i>    | 3,443 $\pm$ 114      | 13,486 $\pm$ 1,027   | 3.92*      | 37,316 $\pm$ 6,363      | 10.8*          | 38,026 $\pm$ 9,200    | 11.0*             |
| <i>Drd4</i>    | 42 $\pm$ 23          | 591 $\pm$ 47         | 14.0*      | 1,761 $\pm$ 131         | 41.9*          | 844 $\pm$ 277         | 20.1*             |
| <i>Dusp1</i>   | 2,890 $\pm$ 222      | 39,866 $\pm$ 3,108   | 13.7*      | 54,066 $\pm$ 2,098      | 18.7*          | 16,933 $\pm$ 2,481    | 5.86*             |
| <i>Egr1</i>    | 7,492 $\pm$ 285      | 9,814 $\pm$ 616      | 1.31       | 7,307 $\pm$ 496         | 1/1.03         | 4,647 $\pm$ 504       | 1/1.61            |
| <i>Esm1</i>    | 74,204 $\pm$ 4,042   | 68,316 $\pm$ 7,033   | 1/1.09     | 246,283 $\pm$ 45,992    | 3.32*          | 179,840 $\pm$ 28,496  | 2.42*             |
| <i>Fcer1a</i>  | 3,443 $\pm$ 114      | 13,486 $\pm$ 1,027   | 3.92*      | 37,316 $\pm$ 6,363      | 10.8*          | 38,026 $\pm$ 9,200    | 11.0*             |
| <i>Fosl2</i>   | 3,541 $\pm$ 203      | 10,942 $\pm$ 1,074   | 3.09*      | 16,782 $\pm$ 1,974      | 4.74*          | 10,318 $\pm$ 486      | 2.91*             |
| <i>Galnt14</i> | 220 $\pm$ 16         | 58 $\pm$ 10          | 1/3.79*    | 102 $\pm$ 15            | 1/2.16 *       | 73 $\pm$ 10           | 1/3.01*           |
| <i>Gapdh#</i>  | 372,002 $\pm$ 9,474  | 371,575 $\pm$ 2,930  | 1.00       | 492,534 $\pm$ 55,230    | 1.32           | 370,866 $\pm$ 83,839  | 1.00              |
| <i>Gch1</i>    | 82,499 $\pm$ 3,009   | 103,457 $\pm$ 6,643  | 1.25       | 97,140 $\pm$ 5,593      | 1.18           | 81,608 $\pm$ 20,032   | 1/1.01            |
| <i>Hhip</i>    | 126 $\pm$ 1          | 2,139 $\pm$ 90       | 16.9*      | 4,613 $\pm$ 2,406       | 36.5*          | 7,444 $\pm$ 2,629     | 59.0*             |
| <i>Id1</i>     | 22,627 $\pm$ 1,878   | 53,412 $\pm$ 10,042  | 2.36       | 67,490 $\pm$ 7,346      | 2.98*          | 44,554 $\pm$ 12,443   | 1.97              |
| <i>Id3</i>     | 31,860 $\pm$ 1,518   | 33,302 $\pm$ 6,219   | 1.05       | 37,259 $\pm$ 5,746      | 1.17           | 25,218 $\pm$ 6,639    | 1/1.26            |

|                |                        |                        |         |                        |          |                          |         |
|----------------|------------------------|------------------------|---------|------------------------|----------|--------------------------|---------|
| <i>Il18</i>    | 8,247 ±<br>599         | 11,199 ±<br>843        | 1.36    | 12,867 ±<br>776        | 1.56*    | 12,006 ±<br>4,337        | 1.46    |
| <i>Kpna2</i>   | 1,061 ±<br>133         | 727 ±<br>63            | 1/1.46  | 1,275 ±<br>122         | 1.20     | 1,307 ±<br>293           | 1.23    |
| <i>Lta</i>     | 21 ±<br>3              | 28 ±<br>7              | 1.36    | 43 ±<br>9              | 2.06     | 38 ±<br>8                | 1.82    |
| <i>Map3k5</i>  | 180 ±<br>6             | 217 ±<br>23            | 1.20    | 442 ±<br>53            | 2.45*    | 391 ±<br>92              | 2.17    |
| <i>Mat2a</i>   | 41,915 ±<br>5,066      | 382,449 ±<br>20,816    | 9.12*   | 460,883 ±<br>46,890    | 11.0*    | 284,240 ±<br>35,635      | 6.78*   |
| <i>Mfrp</i>    | 165 ±<br>89            | 17 ±<br>2              | 1/9.71  | 242 ±<br>131           | 1.46     | 25 ±<br>10               | 1/6.67  |
| <i>Neurod1</i> | 20,131 ±<br>1,227      | 18,112 ±<br>1,130      | 1.11    | 22,784 ±<br>2,353      | 1.13     | 25,657 ±<br>7,795        | 1.27    |
| <i>Npy1r</i>   | 183 ±<br>3             | 48 ±<br>4              | 1/3.81* | 68 ±<br>3              | 1/2.69*  | 91 ±<br>19               | 1/2.01  |
| <i>Nr4a2</i>   | 1,025 ±<br>130         | 1,809 ±<br>257         | 1.76    | 5,198 ±<br>240         | 5.07*    | 2,486 ±<br>442           | 2.42    |
| <i>Opn1sw</i>  | 25 ±<br>3              | 35 ±<br>13             | 1.39    | 37 ±<br>8              | 1.48     | 24 ±<br>3                | 1/1.03  |
| <i>Per2</i>    | 408 ±<br>47            | 450 ±<br>36            | 1.10    | 551 ±<br>38            | 1.35     | 608 ±<br>115             | 1.49    |
| <i>Rnr1#</i>   | 3,232,758 ±<br>243,761 | 3,981,825 ±<br>511,784 | 1.23    | 3,000,323 ±<br>512,915 | 1/1.08   | 5,456,589 ±<br>2,713,637 | 1.69    |
| <i>Slc6a17</i> | 135 ±<br>17            | 593 ±<br>15            | 4.40*   | 1,530 ±<br>225         | 11.3*    | 1,459 ±<br>238           | 10.8*   |
| <i>Slc15a1</i> | 62 ±<br>13             | 29,750 ±<br>2,167      | 479.3*  | 29,314 ±<br>1,428      | 472.2*   | 10,847 ±<br>1,879        | 174.7*  |
| <i>Snf1lk</i>  | 4,327 ±<br>323         | 46,436 ±<br>3,364      | 10.7*   | 51,385 ±<br>3,594      | 11.8*    | 32,355 ±<br>804          | 7.48*   |
| <i>St8sia5</i> | 88 ±<br>6              | 144 ±<br>16            | 1.64    | 200 ±<br>25            | 2.27*    | 157 ±<br>33              | 1.78    |
| <i>Tnf</i>     | 178 ±<br>32            | 172 ±<br>35            | 1/1.03  | 38 ±<br>3              | 1/ 4.68* | 120 ±<br>22              | 1/1.48  |
| <i>Tph1</i>    | 785,890 ±<br>163,346   | 749,609 ±<br>32,003    | 1/1.05  | 838,493 ±<br>21,644    | 1.07     | 647,918 ±<br>101,038     | 1/1.21  |
| <i>Ttr</i>     | 446,404 ±<br>125,114   | 346,788 ±<br>46,967    | 1/1.29  | 517,017 ±<br>116,682   | 1.16     | 334,966 ±<br>124,419     | 1/1.33  |
| <i>Ush2a</i>   | 1,612 ±<br>125         | 646 ±<br>43            | 1/2.50* | 637 ±<br>19            | 1/1.53*  | 676 ±<br>73              | 1/2.38* |
