# Supplementary material
Source: PubMed Central journal article supplement (PMC2658055)
Supplement: M808394200_7.pdf [file M808394200_7.pdf]

|      |                             |     |     |     |  |     |     |     |     |
|------|-----------------------------|-----|-----|-----|--|-----|-----|-----|-----|
| MYOD | M00056-V\$MYOGN<br>F1_01    |     |     |     |  |     | 0.2 |     |     |
|      | MA0055-Myf                  |     |     | 0.6 |  |     |     |     |     |
| NFKB | M00051-V\$NF<br>KAPPAB50_01 |     |     |     |  |     |     |     | 1.6 |
|      | M00194-<br>V\$NFKB_Q6       | 1   |     |     |  |     |     |     |     |
| NKXH | MA0063-Nkx2-5               |     |     |     |  |     |     | 1   |     |
| NR2F | M01032-V\$HNF4<br>_Q6_02    |     |     |     |  |     | 1.2 |     |     |
| OAZF | MA0116-Roaz                 |     | 0.1 |     |  |     |     |     |     |
| OCT  | M00795-V\$OCT_Q6            |     |     |     |  |     |     |     | 1   |
|      | M00137-<br>V\$OCT1_03       |     |     |     |  | 0.1 |     |     |     |
|      | M00138-<br>V\$OCT1_04       |     |     |     |  | 1.4 |     |     |     |
| P53  | MA0106-TP53                 |     |     |     |  |     |     | 0.3 |     |
| PAX4 | MA0068-Pax4                 |     |     |     |  |     |     |     | 1   |
| PAX6 | M00979-<br>V\$PAX6_Q2       |     |     |     |  |     |     | 0.2 |     |
| PDX1 | M01013-<br>V\$IPF1_Q4_01    |     |     |     |  |     | 1   |     |     |
| RORA | M00157-<br>V\$RORA2_01      |     |     |     |  |     | 0.1 |     |     |
| SORY | M00750-<br>V\$HMG1Y_Q6      |     |     |     |  | 1   |     |     |     |
| SP1  | M00255-V\$GC_01             |     |     | 0.1 |  |     |     |     |     |
|      | M00933-<br>V\$SP1_Q2_01     |     |     | 0.1 |  |     |     |     |     |
|      | M00932-<br>V\$SP1_Q4_01     |     | 0.4 | 0.3 |  |     |     |     |     |
|      | M00196-V\$SP1_Q6            |     | 0.3 | 0.3 |  |     |     |     |     |
|      | M00931-<br>V\$SP1_Q6_01     |     | 0.3 | 0.2 |  |     |     |     |     |
| STAT | M00497-<br>V\$STAT3_02      | 1   |     |     |  |     |     |     |     |
| VTBP | M00252-<br>V\$TATA_01       | 1.2 | 0.3 |     |  |     |     |     |     |
|      | MA0108-TBP                  | 1   | 0.6 |     |  |     |     |     |     |
| TCF  | M00285-<br>V\$TCF11_01      |     |     | 0.2 |  |     |     |     |     |
| YY1  | M01035-<br>V\$YY1_Q6_02     |     |     |     |  | 0.1 |     |     |     |
| ZTA  | M00711-V\$ZTA_Q2            |     | 1   |     |  |     |     |     |     |

1. Van Loo, P., Aerts, S., Thienpont, B., De Moor, B., Moreau, Y., and Marynen, P. (2008) *Genome Biol* **9**(4), R66
