# Supplementary material
Source: PubMed Central journal article supplement (PMC2658055)
Supplement: M808394200_8.pdf [file M808394200_8.pdf]

**Supplemental Data Table S8. URLs of ModuleMiner Results.** The numbers in parenthesis are the number of genes in the selected groups that ModuleMiner analyzed.

| <b>Gene group</b>                  | <b>URL of ModuleMiner Results</b>                                                                                                                                                 |
|------------------------------------|-----------------------------------------------------------------------------------------------------------------------------------------------------------------------------------|
| Night/Day = 2 to 4, ¼ to 1/2 (253) | <a href="http://homes.esat.kuleuven.be/~bioiuser/moduleminer/ModuleMiner1218053664286.html">http://homes.esat.kuleuven.be/~bioiuser/moduleminer/ModuleMiner1218053664286.html</a> |
| Night/Day = 4 to 8, ¼ to 1/8 (323) | <a href="http://homes.esat.kuleuven.be/~bioiuser/moduleminer/ModuleMiner1217709849777.html">http://homes.esat.kuleuven.be/~bioiuser/moduleminer/ModuleMiner1217709849777.html</a> |
| Night/Day > 8,<1/8 (15)            | <a href="http://homes.esat.kuleuven.be/~bioiuser/moduleminer/ModuleMiner1218146955531.html">http://homes.esat.kuleuven.be/~bioiuser/moduleminer/ModuleMiner1218146955531.html</a> |
| Pineal rEx > 8(94)                 | <a href="http://homes.esat.kuleuven.be/~bioiuser/moduleminer/ModuleMiner1220050403944.html">http://homes.esat.kuleuven.be/~bioiuser/moduleminer/ModuleMiner1220050403944.html</a> |
| Retina rEx >8 (53)                 | <a href="http://homes.esat.kuleuven.be/~bioiuser/moduleminer/ModuleMiner1220003779817.html">http://homes.esat.kuleuven.be/~bioiuser/moduleminer/ModuleMiner1220003779817.html</a> |
| Pineal,retina rEx> 8 (30)          | <a href="http://homes.esat.kuleuven.be/~bioiuser/moduleminer/ModuleMiner1219957090192.html">http://homes.esat.kuleuven.be/~bioiuser/moduleminer/ModuleMiner1219957090192.html</a> |
| Pineal & pineal,retina (124)       | <a href="http://homes.esat.kuleuven.be/~bioiuser/moduleminer/ModuleMiner1221172537315.html">http://homes.esat.kuleuven.be/~bioiuser/moduleminer/ModuleMiner1221172537315.html</a> |
| Control ( 118 )                    | <a href="http://homes.esat.kuleuven.be/~bioiuser/moduleminer/ModuleMiner1221225714064.htm">http://homes.esat.kuleuven.be/~bioiuser/moduleminer/ModuleMiner1221225714064.htm</a>   |
